# Supplementary material
Source: publisher figshare collection journal article supplement (https://wiley.figshare.com/articles/dataset/_/3561960)
Supplement: Supplementary file 1 [file 1 › appendix-A.htm]

Ecological Archives E096-105-A1


*Ecological Archives* E096-105-A1

Adam Thomas Clark, Hao Ye, Forest Isbell, Ethan R. Deyle, Jane Cowles, G. David Tilman, George Sugihara. 2015. Spatial convergent cross mapping to detect causal relationships from short time series. *Ecology* 96:1174–1181. http://dx.doi.org/10.1890/14-1479.1

Appendix A. Supplemental examples of multispatial CCM analyses for: Spatial "convergent cross mapping" to detect causal relationships from short time-series.

> View / download PDF.


---

[Back to E096-105]
